# Supplementary material for: Thermo-economic optimisation of the polygeneration of synthetic natural gas (SNG), power and heat from lignocellulosic biomass by gasification and methanation
Source: Royal Society of Chemistry journal article supplement (doi:10.1039/c1ee02867g), 2012-01-01
Supplement: _xy-3-1779358_1-1270699.zip [file _xy-3-1779358_1-1270699.zip]

## Sheet: VIP tags
Description of most important tags of SNG model
Category	Name	Unit	Description
mass flow	m_wood_tot	kg/s	Biomass consumption, daf
	m_FAME	kg/s	Biodiesel consumption
	m_SNG	kg/s	SNG production
	ADV_O2_IMP	kg/s	consumption of imported oxygen
	m_CO2_combustion	kg/s	total CO2 production
	m_CO2_pure	kg/s	separated CO2 from crude SNG
	m_CO2cap	kg/s	captured CO2 at 95%mol
	m_H2O_tot_inmax	kg/s	minimum water consumption (without water recovery from wood drying)
	m_H2O_tot_inmin	kg/s	maximum water consumption (with water recovery from wood drying)
energy flow	Energy_Wood	kW	Biomass consumption, daf
(same exist for Exergy)	Energy_FAME	kW	Biodiesel consumption
	Energy_SNG	kW	SNG production
	Energy_DH	kW	Heat production
	w_o2_imp	kW	estimated electricity consumption in O2-production (used in overall energy balance and efficiencies)
	w_steam	kW	gross electricity production in steam cycle
	w_tot	kW	total net electricity consumption, incl. external O2-production
	w_tot_without_o2	kW	net electricity consumption on site
energy, intensive	LHV_drywood	kJ/kg	lower heating value of biomass, daf
	EXV_drywood	kJ/kg	exergy value of biomass, daf
	LHV	kJ/kg	lower heating value of SNG
	EXV	kJ/kg	exergy value of SNG
	WobbeIndex	kWh/Nm3	Wobbe Index of SNG
	DH_Tsupply	K	supply temperature of district heating network
	DH_Treturn	K	return temperature of district heating network
energy, efficiencies	eff_en	-	energy efficiency, LHV basis, daf
	eff_ex	-	exergy efficiency
	eff_en_SNGeq	-	chemical (or SNG-equivalent) efficiency, LHV basis, daf
	eff_en_SNGpartial	-	partial SNG efficiency, base = wood + biodiesel
	eff_en_Epartial	-	partial electric efficiency, base = wood + biodiesel
	eff_en_Qpartial	-	partial heat efficiency, base = wood + biodiesel
investment cost	TGRC_USD	USD	total investment cost in USD (use suffix _CHF or _EUR for CHF and EURO)
(use suffix or _EUR for or EUR)	ic_drying_CHF	CHF	investment cost for drying section
	ic_pyrolysis_CHF		investment cost for pyrolysis/torrefaction section
	ic_gasification_CHF		investment cost for gasification section
	ic_gasconditioning_CHF		investment cost for gas cleaning section
	ic_mreactor_CHF		investment cost for methanation section (incl. producer gas compression)
	ic_electrolysis_CHF		investment cost for electrolysis section
	ic_SNGconditioning_CHF		investment cost for CO2-removal, gas drying and hydrogen removal for SNG conditioning to grid quality
	ic_turbine_hex_CHF		investment cost for Rankine cycle (i.e. steam turbine and steam generator)
	ic_process_hex_CHF		investment cost for heat exchanger network
	ic_catcomb_CHF		investment cost for catalytic combustion
	ic_gturbine_CHF		investment cost for gas turbine (for pressurised, indirectly heated gasification)
operating costs	labour_cost	CHF/MWh SNG	labour cost
(use suffix _USD or _EUR for USD or EUR)	maintenance_cost	CHF/MWh SNG	maintenance
	wood_cost	CHF/MWh SNG	biomass
	electricity_cost	CHF/MWh SNG	electricity
	oxygen_cost	CHF/MWh SNG	oxygen
	FAME_cost	CHF/MWh SNG	biodiesel
	operating_cost	CHF/MWh SNG	total operation, sum of above
	depreciation_cost	CHF/MWh SNG	annual equipment depreciation, calculated from investment
	production_cost	CHF/MWh SNG	total production costs: sum of operating & depreciation costs
	resource_profitability	CHF/MWh biomass	resource profitability
technology choice	BN_DRY	-	drying (1: air, 2: steam, 3: air and steam, 4: steam and air)
	BN_PYR	-	thermochemical pretreatment (0: none, 1: mechanically moved pyrolysis (screw or rotary), 4: torrefaction)
	BN_GAS	-	gasification (1: FICFB, 2: CFB-O2, 3: Viking-O2)
	BN_GCL	-	gas cleaning (1: cold (i.e. with condensation), 2: hot (without condensation))
	BN_CO2REM	-	CO2-removal (1/4: PSA downstream/upstream of methanation, 2/5: Selexol absorption downstream/upstream of methanation, 3: membrane cascade downstream methanation)
	BN_STEAM	-	Rankine cycle (0: not used, 1: used) Note: Rankine cycle may not be in use even if BN_STEAM=1 since its use is not optimal in the MILP subproblem
	BN_DH	-	district heating (0: not used, 1: used)
operating conditions
- drying	dta	K	Air dryer inlet temperature
	dts	K	Steam dryer inlet temperature
	dp	bar	Steam dryer pressure
	whum	-	Wood humidity at gasifier inlet
- thermochem. Pretreatment	dtt	K	Torrefaction inlet temperature
- gasification	stm_bmss	-	Steam to dry biomass ratio
	gp	bar	Gasification pressure
	gt	K	Gasification temperature
	pt	K	Steam/oxygen preheat temperature for gasification
- methane synthesis	mp	bar	Methanation pressure
	mti	K	Methanation inlet temperature
	mto	K	Methanation outlet temperature
- gas separation	WOBBE	kWh/Nm3	Wobbe Index after CO2 removal
	PRE_CO2_REM	-	relative amount of CO2 removed before methanation
	CH4_REC	-	CH4-recovery in CO2-removal
- gas separation, selexol	F_3_201_P	bar	Absorption pressure
	A_CO2	-	Absorption factor
	F_3_212_P	bar	Absorption flash recovery pressure
- gas separation, membranes	pH_1	bar	feed pressure of stage 3 (corresponds to stage 1 in model)
	pH_2	bar	feed pressure of stage 2
	pH_3	bar	feed pressure of stage 1 (corresponds to stage 3 in model)
	STAGE_CUT_1	-	molar stage cut of stage 3 (corresponds to stage 1 in model)
	STAGE_CUT_2	-	molar stage cut of stage 2
	STAGE_CUT_3	-	molar stage cut of stage 1 (corresponds to stage 3 in model)
	sfraction_inlet_remaining_to_2		Fraction of feed to stage 2
- combustion	T_FPH	K	preheat temperature of waste streams used in conventional and catalytic combustion as fuel
- Rankine cycle	P_STEAM	bar	Steam production pressure
	T_STEAM_MAX	K	Steam superheat temperature
	T_BLEED	K	Temperature of utilisation level 3 (level 1 and 2 are matched with gasification and methanation steam requirements, level 4 corresponds to the condensation level)
	T_SCOND	K	Condensation temperature
vessel sizing	d_dfg	m	diameter of air (flue gas) dryer
	l_dfg	m	length of air (flue gas) dryer
	v_dfg	m3	volume of air (flue gas) dryer
	nb_dfg	-	number of air (flue gas) dryer units
	d_dst	m	diameter of steam dryer
	h_dt	m	height of steam dryer
	v_dst	m3	volume of steam dryer
	nb_dst	-	number of steam dryer units
	d_pyr	m	diameter of pyrolysis unit
	l_pyr	m	length of pyrolysis unit
	v_pyr	m3	volume of pyrolysis unit
	nb_pyr	-	number of pyrolysis units
	d_tor	m	diameter of torrefaction unit
	h_tor	m	height of torrefaction unit
	v_tor	m3	volume of torrefaction unit
	nb_tor	-	number of torrefaction units
	d_gas	m	diameter of gasifier
	h_gas	m	height of gasifier
	v_gas	m3	volume of gasifier
	d_comb	m	diameter of combustion chamber of FICFB gasifier
	h_comb	m	height of combustion chamber of FICFB gasifier
	v_comb	m3	volume of combustion chamber of FICFB gasifier
	nb_gas	-	number of gasifier units
	d_gbed	m	length of Zn-guard bed for sulphur removal
	h_gded	m	height of Zn-guard bed for sulphur removal
	v_gbed	m3	volume of Zn-guard bed for sulphur removal
	nb_gbed	-	number of Zn-guard beds for sulphur removal
	d_meth	m	diameter of methanation reactor
	h_meth	m	height of methanation reactor
	v_meth	m3	volume of methanation reactor
	nb_meth	-	number of methanation reactors
	d_TSA	m	diameter of TSA vessels
	h_TSA	m	height of TSA vessels
	v_TSA	m3	volume of TSA vessels
	nb_TSA	-	number of TSA vessels
	d_PSA	m	diameter of PSA vessels
	h_PSA	m	height of PSA vessels
	v_PSA	m3	volume of PSA vessels
	nb_PSA	-	number of PSA vessels
	d_abs	m	diameter of absorption tower
	h_abs	m	height of absorption tower
	v_abs	m3	volume of absorption tower
	d_reg	m	diameter of regeneration tower
	h_reg	m	height of regeneration tower
	v_reg	m3	volume of regeneration tower
	nb_abs	-	number of absorption and regeneration towers
	d_fd1	m	diameter of flash drum 1
	h_fd1	m	height of flash drum 1
	v_fd1	m3	volume of flash drum 1
	nb_fd1	-	number of flash drums 1
	d_fd2	m	diameter of flash drum 2
	h_fd2	m	height of flash drum 2
	v_fd2	m3	volume of flash drum 2
	nb_fd2	-	number of flash drums 2
	total_area	m2	total area of celullose acetate membranes for CO2 removal (membrane for H2-recycling not included)
	v_memb	m3	volume of membrane package
	A_boiler	m2	heat transfer area in steam boiler
	HTG_AREA	m2	total heat exchanger area
	HTX_NMINMER	-	minimum number of heat exchangers

## Sheet: costing parameters
Description of costing parameter tags and their default values in the model
Name	Default value	Unit	Description
MS_index	1302	-	Marshall and Swift index
USD_CHF	1.5	-	Currency exchange rate USD -> CHF
USD_EUR	1	-	Currency exchange rate USD -> EUR
lifespan	15	years	Discount period for investment
ir	0.06	-	interest rate for investment discounting
operation	0.9	-	Average plant operation
operators	4	-	Number of operators for plant capacity of 20 MW biomass. Scaled with an exponent of 0.7 for other scales
salary	91070	CHF/year	operator salary
price_wood	50	CHF/MWh	wood price, data Peyer/Stucki june 2008
price_el_exp	270	CHF/MWh	Electricity price, production
price_el_imp	270	CHF/MWh	Electricity price, consumption
price_dh	120	CHF/MWh	Price for distributed heat, value from CTU
price_SNG	180	CHF/MWh	SNG price, data Peyer/Stucki june 2008
price_FAME	160	CHF/MWh	Biodiesel price, corresponds to 1.45 CHF/l

## Sheet: technology scenario folders
Description of folder classifications according to technology scenarios in SNG optimisation
character string
FICFB	FICFB gasification at atmospheric pressure
pFICFB	pressurised FICFB gasification
pFICFBgt	pressurised FICFB gasification with power recovery by expanding the flue gases in turbine
CFBO2	pressurised CFB gasification directly heated with oxygen
_XY	X: CO2-removal technology (X=BN_CO2REM; 1/4: PSA downstream/upstream of methanation; 2/5: Selexol absorption downstream/upstream of methanation; 3: membrane cascade downstream methanation)
	Y: drying technology (Y=BN_DRY-1; 0: air drying, 1: steam drying)
_tor	with torrefaction (i.e. BN_PYR=4, otherwise BN_PYR=0)
_hcl	hot gas cleaning (i.e. BN_GCL=2, otherwise cold gas cleaning (BN_GCL=1))
_nodh	without district heating (i.e. BN_DH=0, otherwise with heat cogeneration into a 110/70°C distribution grid (BN_DH=1))
